# Supplementary material for: PLAC1 as a serum biomarker for breast cancer
Source: PubMed Central journal article supplement (PMC5809008; doi:10.1371/journal.pone.0192106), 2018-02-12
Supplement: pone.0192106.s001.pdf [file pone.0192106.s001.pdf]

### Farmer

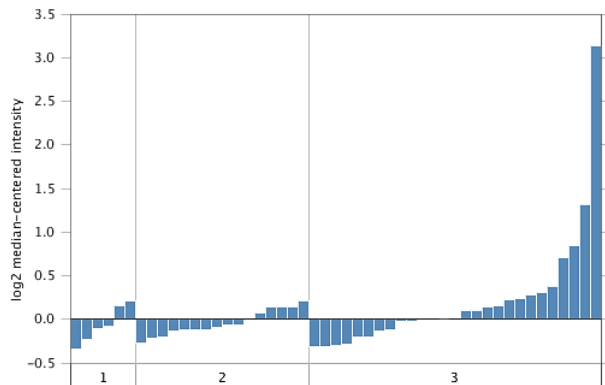

1. Apocrine Breast Carcinoma (6); 2. Basal-Like Subtype of Invasive Breast Carcinoma (16); 3. Luminal-Like Subtype of Invasive Breast Carcinoma (27)

### Ma

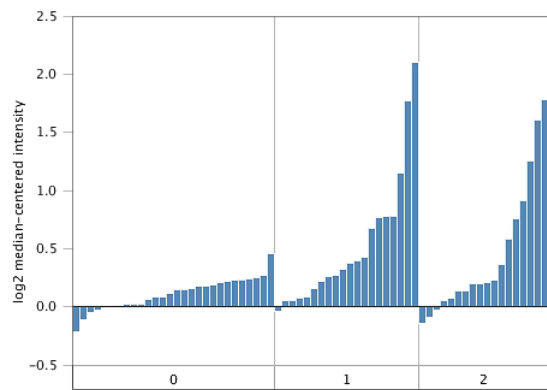

0. No value (28); 1. Ductal Breast Carcinoma in Situ (20); 2. Invasive Ductal Breast Carcinoma (18)

### Bonnefoi

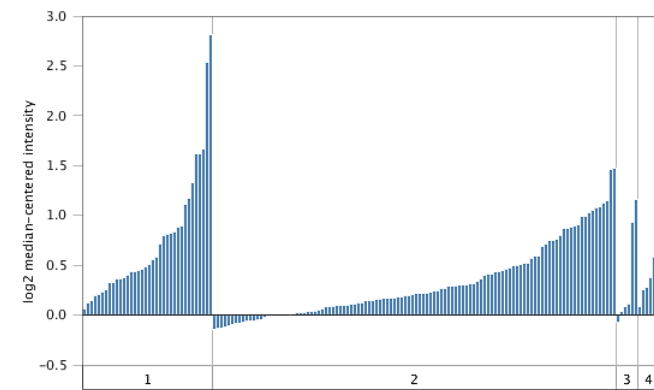

1. Breast Carcinoma (36); 2. Ductal Breast Carcinoma (112); 3. Invasive Breast Carcinoma (6); 4. Lobular Breast Carcinoma (6)

### Lu

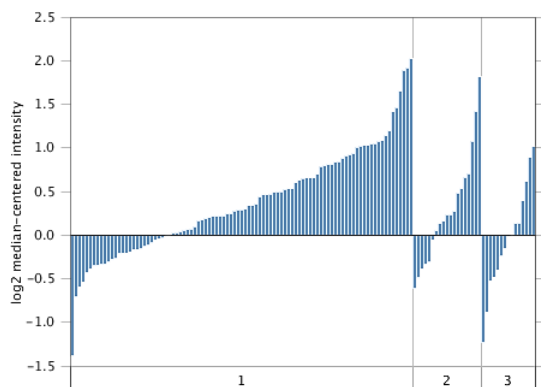

1. Ductal Breast Carcinoma (95); 2. Lobular Breast Carcinoma (19); 3. Mixed Lobular and Ductal Breast Carcinoma (15)

### TCGA

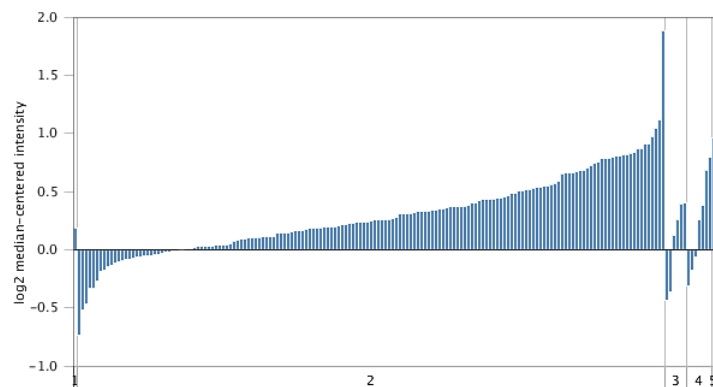

1. Invasive Breast Carcinoma (1); 2. Invasive Ductal Breast Carcinoma (163); 3. Invasive Ductal and Lobular Carcinoma (6); 4. Invasive Lobular Breast Carcinoma (7); 5. Mucinous Breast Carcinoma (1)

### Loi

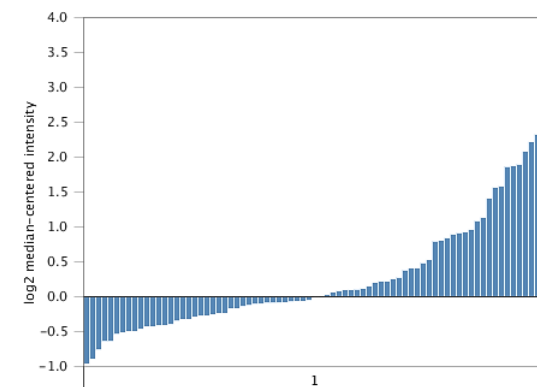

1. Invasive Breast Carcinoma (77)

### TCGA

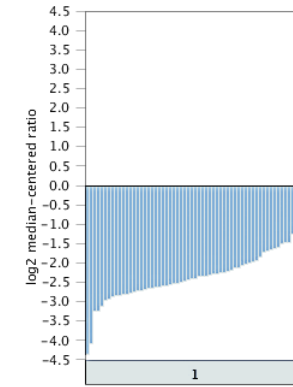

1. Breast (61)
