# Supplementary material for: PLAC1 as a serum biomarker for breast cancer
Source: PubMed Central journal article supplement (PMC5809008; doi:10.1371/journal.pone.0192106), 2018-02-12
Supplement: pone.0192106.s002.pdf [file pone.0192106.s002.pdf]

**S1 Table.** Subject Characteristics and PLAC1 Serum Levels. PLAC1 serum levels (mean±SD) are given as ng/ml. FCD, fibrocystic condition; GERD, gastroesophageal reflux disease; IBS, irritable bowel syndrome; B, African-American; W, Caucasian; A, Asian/Pacific Islander; O, other Non-Hispanic; NA, not available.

| Subjects | Subject No. | Serum Level PLAC1, ng/ml | Diagnosis                                | Race | Age | BMI  | Mammogram             |  |
|----------|-------------|--------------------------|------------------------------------------|------|-----|------|-----------------------|--|
|          |             |                          |                                          |      |     |      | BIRADS Classification |  |
| Controls | 32541       | 54                       | IBS                                      | W    | 44  | 18.9 | 1                     |  |
|          | 33133       | 47                       | IBS                                      | W    | 45  | 30.0 | 1                     |  |
|          | 34611       | 23                       | GERD                                     | W    | 47  | 22.3 | 1                     |  |
|          | 34633       | 0                        | negative                                 | O    | 45  | 21.8 | 1                     |  |
|          | 34636       | 13                       | ovarian cyst                             | W    | 73  | 24.5 | 1                     |  |
|          | 34657       | 0                        | IBS                                      | W    | 58  | 24.5 | 1                     |  |
|          | 34756       | 0                        | negative                                 | W    | 50  | 22.6 | 1                     |  |
|          | 35536       | 49                       | negative                                 | B    | 84  | 26.5 | 1                     |  |
|          | 35934       | 15                       | endometriosis                            | B    | 44  | 25.4 | NA                    |  |
|          | 35506       | 64                       | uterine bleeding, cervical radiculopathy | B    | 26  | 32.0 | NA                    |  |
|          | 35858       | 24                       | depression                               | W    | 52  | 19.0 | 1                     |  |
|          | 35859       | 30                       | negative                                 | W    | 54  | 23.9 | 1                     |  |
|          | 35834       | 31                       | negative                                 | B    | 44  | 35.1 | NA                    |  |
|          | 35868       | 33                       | negative                                 | W    | 69  | 20.9 | NA                    |  |
|          | 35871       | 7                        | negative                                 | W    | 63  | 22.2 | 1                     |  |
|          | 35876       | 17                       | negative                                 | W    | 70  | 26.7 | 1                     |  |
|          | 35879       | 45                       | negative                                 | B    | 23  | 25.7 | NA                    |  |
|          | 35880       | 54                       | negative                                 | A    | 19  | 22.3 | NA                    |  |
|          | 35881       | 22                       | negative                                 | W    | 27  | 24.2 | NA                    |  |
|          | 35891       | 32                       | negative                                 | W    | 24  | 22.0 | NA                    |  |
|          | 35893       | 8                        | asthma                                   | A    | 25  | 33.7 | NA                    |  |
|          | 35895       | 19                       | arthritis                                | W    | 57  | 22.9 | 1                     |  |
|          | 35896       | 14                       | unremarkable                             | W    | 66  | 26.7 | 1                     |  |
|          | 35899       | 21                       | hypertension                             | W    | 69  | 17.3 | 1                     |  |
|          | 35906       | 15                       | unremarkable                             | W    | 69  | 26.9 | 1                     |  |
|          | 35912       | 12                       | negative                                 | W    | 46  | 21.9 | NA                    |  |
|          | 35924       | 0                        | pituitary adenoma                        | W    | 24  | 28.3 | 1                     |  |
|          | 35912       | 12                       | negative                                 | W    | 46  | 21.9 | NA                    |  |
|          | 35933       | 16                       | negative                                 | W    | 26  | 20.9 | NA                    |  |
|          | 35962       | 23                       | negative                                 | B    | 29  | 19.9 | NA                    |  |
|          | 35963       | 19                       | negative                                 | A    | 29  | 22.3 | NA                    |  |
|          | 35967       | 33                       | negative                                 | W    | 27  | 23.4 | NA                    |  |
|          | 36037       | 24                       | negative                                 | W    | 23  | 21.5 | NA                    |  |
|          | FCD         | 32523                    | 9                                        | FCD  | B   | 42   | 29.3                  |  |
|          |             | 32525                    | 43                                       | FCD  | B   | 29   | 21.5                  |  |
|          |             | 33114                    | 2                                        | FCD  | B   | 47   | 25.3                  |  |
| 33115    |             | 40                       | FCD                                      | W    | 24  | 26.3 |                       |  |
| 33125    |             | 12                       | FCD                                      | W    | 41  | 22.1 |                       |  |
| 33131    |             | 2                        | FCD                                      | A    | 31  | 26.4 |                       |  |
| 33415    |             | 0                        | FCD                                      | B    | 44  | 33.6 |                       |  |
| 34628    |             | 0                        | FCD                                      | B    | 53  | 38.6 |                       |  |
| 34713    |             | 27                       | FCD                                      | W    | 34  | 17.3 |                       |  |
| 34754    |             | 24                       | FCD                                      | W    | 43  | 23.4 |                       |  |
| 34757    |             | 36                       | FCD                                      | W    | 34  | 26.8 |                       |  |
| 35554    |             | 64                       | FCD                                      | B    | 43  | 42.6 |                       |  |
| 35627    |             | 55                       | FCD                                      | B    | 53  | 38.6 |                       |  |
| 35797    |             | 66                       | FCD                                      | B    | 52  | 39.1 |                       |  |
| 35872    |             | 37                       | FCD                                      | W    | 47  | 23.1 |                       |  |
| 35888    |             | 0                        | FCD                                      | W    | 46  | 35.1 |                       |  |
| 35897    |             | 48                       | FCD                                      | W    | 48  | 27.4 |                       |  |
| 36028    |             | 30                       | FCD                                      | B    | 44  | 25.4 |                       |  |
| DCIS     | 31996       | 31                       | Stage 0: pTis                            | O    | 48  | 24.3 |                       |  |
|          | 32005       | 75                       | Stage 0: pTis                            | O    | 32  | 28.3 |                       |  |
|          | 32018       | 69                       | Stage 0: pTis                            | B    | 43  | 26.7 |                       |  |
|          | 32032       | 49                       | Stage 0: pTis                            | W    | 45  | 19.6 |                       |  |
|          | 32161       | 83                       | Stage 0: pTis                            | W    | 50  | 23.0 |                       |  |
|          | 32165       | 45                       | Stage 0: pTis                            | W    | 52  | 22.3 |                       |  |
|          | 32421       | 42                       | Stage 0: pTis                            | B    | 47  | 31.1 |                       |  |
|          | 32822       | 27                       | Stage 0: pTis                            | O    | 45  | 22.9 |                       |  |
|          | 33533       | 27                       | Stage 0: pTis                            | W    | 84  | 22.6 |                       |  |
|          | 33843       | 39                       | Stage 0: pTis                            | W    | 51  | 20.9 |                       |  |
|          | 34578       | 47                       | Stage 0: pTis                            | W    | 37  | 25.9 |                       |  |
|          | 34629       | 15                       | Stage 0: pTis                            | W    | 46  | 48.9 |                       |  |
|          | 35513       | 85                       | Stage 0: pTis                            | B    | 70  | 37.1 |                       |  |
|          | 35556       | 158                      | Stage 0: pTis                            | B    | 57  | 27.3 |                       |  |
|          | 35559       | 73                       | Stage 0: pTis                            | W    | 48  | 18.7 |                       |  |
|          | 35655       | 44                       | Stage 0: pTis                            | B    | 45  | 40.0 |                       |  |
|          | 35678       | 52                       | Stage 0: pTis                            | B    | 62  | 28.5 |                       |  |
|          | 35843       | 69                       | Stage 0: pTis                            | A    | 59  | 23.7 |                       |  |
|          | 35926       | 70                       | Stage 0: pTis                            | W    | 74  | 25.7 |                       |  |
|          | 35941       | 121                      | Stage 0: pTis                            | W    | 52  | 30.0 |                       |  |
|          | 35956       | 40                       | Stage 0: pTis                            | B    | 42  | 28.9 |                       |  |
|          | 35959       | 24                       | Stage 0: pTis                            | W    | 40  | 29.4 |                       |  |
|          | 36042       | 48                       | Stage 0: pTis                            | W    | 44  | 26.6 |                       |  |
|          | 36056       | 30                       | Stage 0: pTis                            | W    | 51  | 19.5 |                       |  |

|                                                       |             |                           |                           |                           |      |      |      |
|-------------------------------------------------------|-------------|---------------------------|---------------------------|---------------------------|------|------|------|
| <b>HER2<sup>+</sup></b>                               | 32137       | 66                        | Stage 2B: pT2 N0 M0; IDC  | W                         | 35   | 22.6 |      |
|                                                       | 32195       | 24                        | Stage 1A: pT1 N0 M0; IDC  | W                         | 54   | 25.7 |      |
|                                                       | 32210       | 30                        | Stage 2A: pT2 N0 M0; IDC  | W                         | 35   | 18.2 |      |
|                                                       | 33997       | 44                        | Stage 3B: pT1 N1 M0; IDC  | B                         | 73   | 28.1 |      |
|                                                       | 34156       | 36                        | Stage 2A: pT2 N0 M0; IDC  | O                         | 32   | 23.5 |      |
|                                                       | 35618       | 45                        | Stage 1A: pT1c N2 M0; IDC | B                         | 68   | 31.6 |      |
|                                                       | 35630       | 77                        | Stage 1A: pT1a N0 M0; IDC | W                         | 41   | 28.8 |      |
|                                                       | 35653       | 168                       | Stage 1A: pT1 N0 M0; IDC  | W                         | 67   | 24.9 |      |
|                                                       | 35663       | 55                        | Stage 1A: pT1c N0 M0; IDC | W                         | 67   | 30.9 |      |
|                                                       | 35674       | 88                        | Stage 1A: pT1a N0 M0; IDC | W                         | 55   | 32.1 |      |
|                                                       | 35684       | 95                        | Stage 2A: pT1c N1 M0; IDC | W                         | 60   | 24.2 |      |
|                                                       | 35875       | 44                        | Stage 2A: pT2 N0 M0; IDC  | W                         | 49   | 26.4 |      |
|                                                       | 35935       | 35                        | Stage 1A: pT1c N0 M0; IDC | W                         | 43   | 24.7 |      |
|                                                       | 35977       | 40                        | Stage 2B: pT2 N1 M0; IDC  | B                         | 57   | 22.7 |      |
|                                                       | 36113       | 64                        | Stage 1A: pT1c N0 M0; IDC | B                         | 63   | 30.3 |      |
|                                                       | <b>TNBC</b> | 32089                     | 37                        | Stage 1A: pT1a N0 M0; IDC | W    | 69   | 19.4 |
|                                                       |             | 32127                     | 66                        | Stage 2A: pT2,N0 M0; IDC  | W    | 45   | 25.6 |
| 32137                                                 |             | 32                        | Stage 2A: pT2b N0 M0; IDC | W                         | 36   | 22.6 |      |
| 32195                                                 |             | 24                        | Stage 1A: pT1a N0 M0; IDC | W                         | 55   | 25.7 |      |
| 32205                                                 |             | 70                        | Stage 1A: pT1a N0 M0; IDC | W                         | 60   | 21.0 |      |
| 33463                                                 |             | 74                        | Stage 3A: pT2 N2 M0; IDC  | B                         | 49   | 23.1 |      |
| 34500                                                 |             | 60                        | Stage 2A: pT2 N0 M0; IDC  | W                         | 35   | 24.0 |      |
| 35482                                                 |             | 122                       | Stage 1A: pT1c N0 M0; IDC | O                         | 41   | 20.4 |      |
| 35525                                                 |             | 103                       | Stage 2A: pT1c N1 M0; IDC | W                         | 51   | 21.5 |      |
| 35639                                                 |             | 85                        | Stage 1A: pT1b N0 M0; IDC | B                         | 64   | 32.0 |      |
| 35708                                                 |             | 55                        | Stage 2A: pT2 N0 M0; IDC  | W                         | 62   | 27.6 |      |
| 35842                                                 |             | 59                        | Stage 2A: pT2 N0 M0; IDC  | W                         | 29   | 31.7 |      |
| 35864                                                 |             | 78                        | Stage 1A: pT1b N0 M0; IDC | B                         | 54   | 26.6 |      |
| 35990                                                 |             | 47                        | Stage 3A: pT2 N1 M0; IDC  | W                         | 43   | 25.4 |      |
| 36196                                                 |             | 32                        | Stage 3C: pT2 N3 M0; IDC  | B                         | 32   | 22.9 |      |
| <b>ER<sup>+</sup>/PR<sup>+</sup>/HER2<sup>-</sup></b> |             | 31861                     | 49                        | Stage 1A: pT1b N0 M0; IDC | W    | 49   | 25.3 |
|                                                       |             | 31869                     | 1402                      | Stage 1A: pT1c N0 M0; IDC | B    | 61   | 34.0 |
|                                                       | 31874       | 147                       | Stage 2A: pT2 N0 M0; IDC  | B                         | 53   | 36.8 |      |
|                                                       | 31929       | 24                        | Stage 2A: pT2 N0 M0; IDC  | B                         | 32   | 28.0 |      |
|                                                       | 31930       | 124                       | Stage 2A: pT2 N0 M0; IDC  | W                         | 68   | 36.9 |      |
|                                                       | 31948       | 21                        | Stage 2A: pT3 N2 M0; IDC  | W                         | 75   | 22.3 |      |
|                                                       | 31950       | 52                        | Stage 3C: pT2 N3 M0; IDC  | W                         | 52   | 29.7 |      |
|                                                       | 31994       | 25                        | Stage 1A: pT1c N0 M0; IDC | O                         | 50   | 29.5 |      |
|                                                       | 32013       | 119                       | Stage 3C: pT2 N3 M0; IDC  | W                         | 41   | 31.1 |      |
|                                                       | 32090       | 46                        | Stage 1A: pT1c N0 M0; IDC | W                         | 47   | 37.6 |      |
|                                                       | 32095       | 39                        | Stage 2A: pT2 N0 M0; IDC  | W                         | 66   | 25.0 |      |
|                                                       | 32128       | 35                        | Stage 1A: pT1c N0 M0; IDC | W                         | 46   | 35.3 |      |
|                                                       | 32143       | 126                       | Stage 1A: pT1c N0 M0; IDC | W                         | 45   | 27.9 |      |
|                                                       | 32144       | 106                       | Stage 1A: pT1b N0 M0; IDC | B                         | 50   | 28.1 |      |
|                                                       | 32177       | 30                        | Stage 1A: pT1c N0 M0; IDC | W                         | 52   | 18.2 |      |
|                                                       | 32179       | 113                       | Stage 1A: pT1c N0 M0; IDC | W                         | 41   | 24.3 |      |
|                                                       | 32191       | 1472                      | Stage 1A: pT1b N0 M0; IDC | W                         | 53   | 23.0 |      |
|                                                       | 32204       | 232                       | Stage 1A: pT1a N0 M0; IDC | W                         | 57   | 24.9 |      |
|                                                       | 32226       | 49                        | Stage 1A: pT1c N0 M0; IDC | W                         | 64   | 29.6 |      |
|                                                       | 32236       | 21                        | Stage 1A: pT1b N0 M0; IDC | B                         | 49   | 29.9 |      |
|                                                       | 32277       | 141                       | Stage 1A: pT1c N0 M0; IDC | W                         | 79   | 28.1 |      |
|                                                       | 32282       | 39                        | Stage 2A: pT2 N0 M0; IDC  | O                         | 69   | 24.1 |      |
|                                                       | 32511       | 129                       | Stage 2A: pT2 N0 M0; IDC  | W                         | 37   | 40.5 |      |
|                                                       | 32517       | 145                       | Stage 1A: pT1a N0 M0; IDC | W                         | 60   | 33.8 |      |
|                                                       | 33021       | 134                       | Stage 2C: pT1c N3 M0; IDC | B                         | 37   | 40.5 |      |
|                                                       | 33113       | 39                        | Stage 1B: pT1c N1 M0; IDC | W                         | 50   | 30.7 |      |
|                                                       | 33132       | 25                        | Stage 1A: pT1b N0 M0; IDC | B                         | 44   | 23.1 |      |
|                                                       | 33419       | 185                       | Stage 1A: pT1a N0 M0; IDC | W                         | 55   | 24.0 |      |
|                                                       | 33492       | 201                       | Stage 2A: pT2 N2 M0; IDC  | W                         | 49   | 29.4 |      |
|                                                       | 33550       | 139                       | Stage 2A: pT2 N0 M0; IDC  | B                         | 49   | 43.7 |      |
|                                                       | 33757       | 47                        | Stage 1A: pT1c N0 M0; IDC | W                         | 52   | 25.9 |      |
|                                                       | 33808       | 68                        | Stage 1A: pT1b N0 M0; IDC | W                         | 48   | 19.2 |      |
|                                                       | 33821       | 48                        | Stage 3A: pT2 N2 M0; IDC  | W                         | 60   | 23.9 |      |
|                                                       | 33908       | 37                        | Stage 2B: pT2 N1 M0; IDC  | B                         | 50   | 26.7 |      |
|                                                       | 33916       | 75                        | Stage 2A: pT2 N1 M0; IDC  | W                         | 35   | 34.0 |      |
|                                                       | 34112       | 50                        | Stage 1A: pT1b N0 M0; IDC | W                         | 56   | 19.6 |      |
|                                                       | 34123       | 39                        | Stage 2A: pT2 N1 M0; IDC  | W                         | 56   | 30.7 |      |
|                                                       | 34282       | 55                        | Stage 1A: pT1b N0 M0; IDC | B                         | 61   | 31.5 |      |
|                                                       | 34293       | 74                        | Stage 1A: pT1b N0 M0; IDC | W                         | 75   | 19.7 |      |
|                                                       | 34589       | 110                       | Stage 1A: pT1b N0 M0; IDC | A                         | 51   | 23.3 |      |
|                                                       | 35442       | 126                       | Stage 3A: pT3 N1 M0; IDC  | W                         | 57   | 24.3 |      |
|                                                       | 35464       | 58                        | Stage 1A: pT1a N0 M0; IDC | B                         | 64   | 38.2 |      |
| 35467                                                 | 60          | Stage 1A: pT1c N0 M0; IDC | W                         | 64                        | 27.4 |      |      |
| 35469                                                 | 52          | Stage 3C: pT1b N3 M0; IDC | B                         | 65                        | 35.7 |      |      |
| 35522                                                 | 58          | Stage 3A: pT2 N2 M0; IDC  | B                         | 51                        | 20.7 |      |      |
| 35524                                                 | 52          | Stage 3A: pT2 N0 M0; IDC  | B                         | 73                        | 26.2 |      |      |
| 35566                                                 | 50          | Stage 1A: pT1a N0 M0; IDC | W                         | 54                        | 26.2 |      |      |
| 35602                                                 | 58          | Stage 1A: pT1b N0 M0; IDC | W                         | 44                        | 24.6 |      |      |
| 35629                                                 | 103         | Stage 1A: pT1c N0 M0; IDC | W                         | 51                        | 23.0 |      |      |

|       |     |                           |   |    |      |
|-------|-----|---------------------------|---|----|------|
| 35640 | 49  | Stage 1A: pT1b N0 M0; IDC | B | 73 | 24.3 |
| 35663 | 55  | Stage 1A: pT1c N0 M0; IDC | W | 67 | 30.9 |
| 35668 | 56  | Stage 1A: pT1b N0 M0; IDC | W | 48 | 20.9 |
| 35674 | 88  | Stage 1A: pT1a N0 M0; IDC | W | 55 | 32.1 |
| 35684 | 95  | Stage 2A: pT1c N1 M0; IDC | W | 60 | 24.2 |
| 35688 | 56  | Stage 1A: pT1c N0 M0; IDC | A | 59 | 26.6 |
| 35706 | 100 | Stage 1A: pT1a N0 M0; IDC | B | 69 | 32.2 |
| 35746 | 86  | Stage 1A: pT1a N0 M0; IDC | W | 51 | 25.1 |
| 35778 | 51  | Stage 1A: pT1a N0 M0; IDC | W | 54 | 24.9 |
| 35791 | 30  | Stage 2A: pT1a N1 M0; IDC | W | 31 | 26.5 |
| 35806 | 24  | Stage 1A: pT1c N0 M0; IDC | B | 56 | 32.4 |
| 35850 | 49  | Stage 2A: pT2 N0 M0; IDC  | W | 60 | 26.1 |
| 35981 | 40  | Stage 3A: pT3 N1 M0; IDC  | W | 76 | 21.4 |
| 36158 | 23  | Stage 3A: pT2 N2 M0; IDC  | B | 45 | 25.2 |
